# Supplementary material
Source: PubMed Central journal article supplement (PMC3343468)
Supplement: emboj201270s1.pdf [file emboj201270s1.pdf]

## **SUPPLEMENTAL INFORMATION**

**(Quirós et al. “Loss of mitochondrial protease OMA1 alters processing of the GT-Pase OPA1 and causes obesity and defective thermogenesis in mice”)**

## **SUPPLEMENTAL FIGURES**

**A**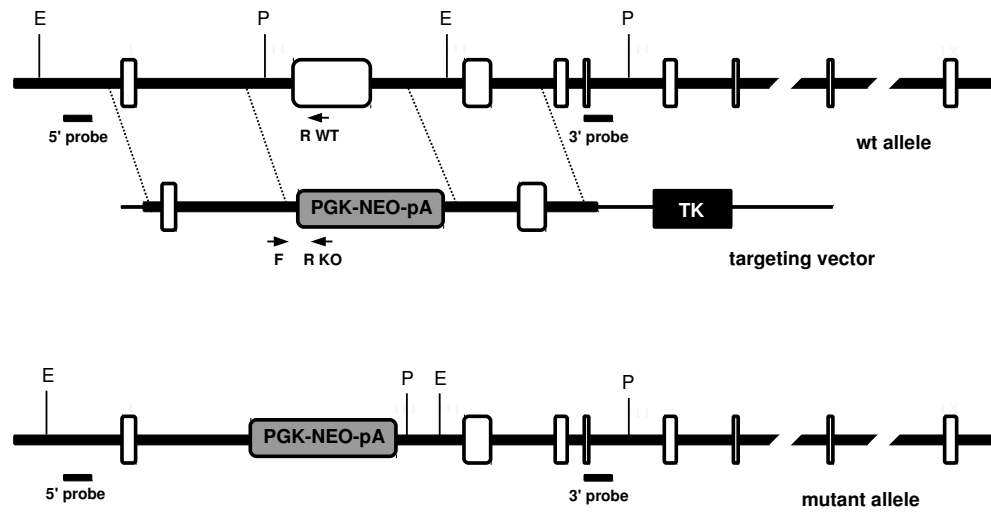**B**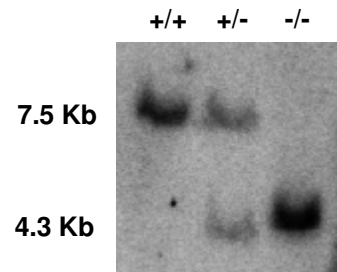**C**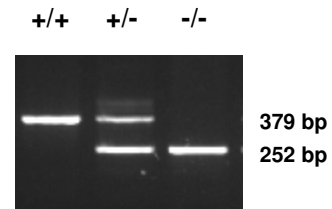

Figure S1, Quirós et al.



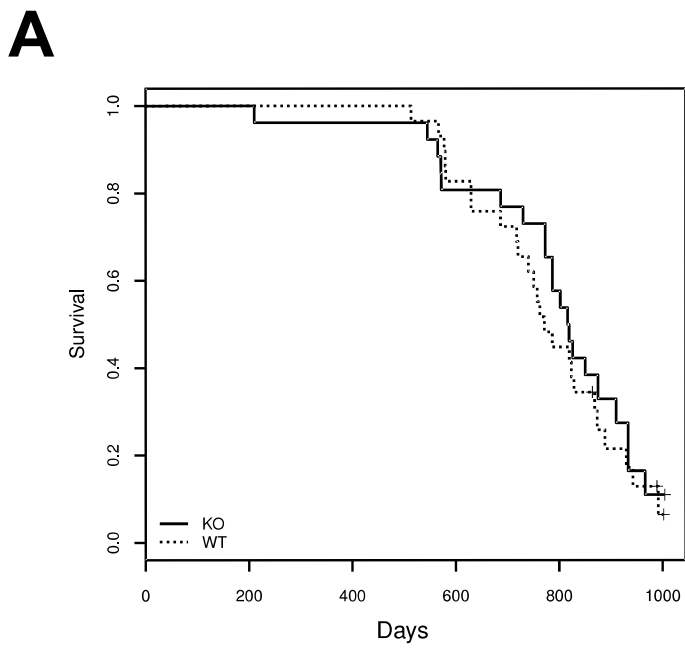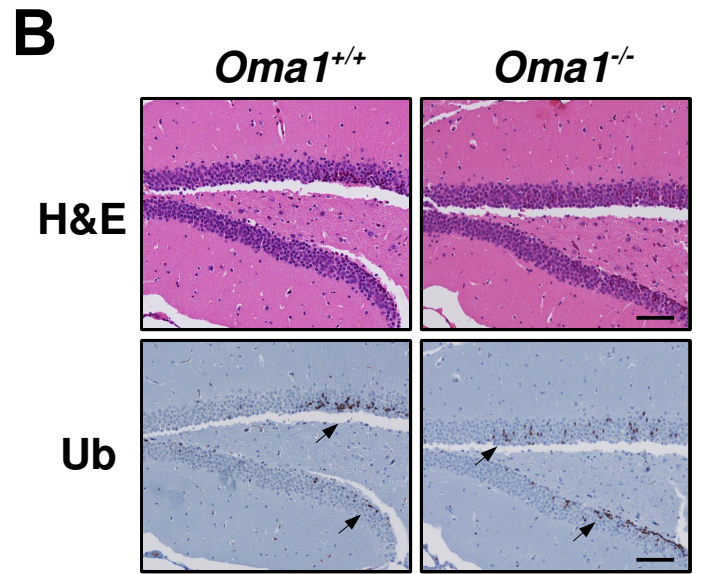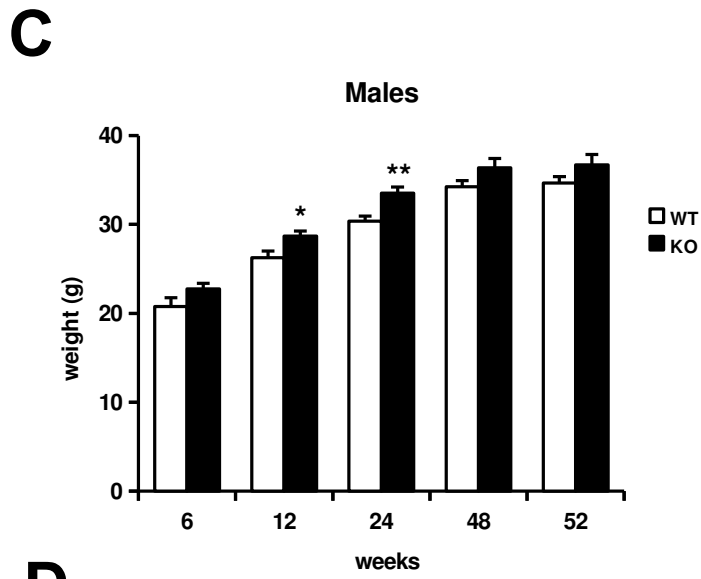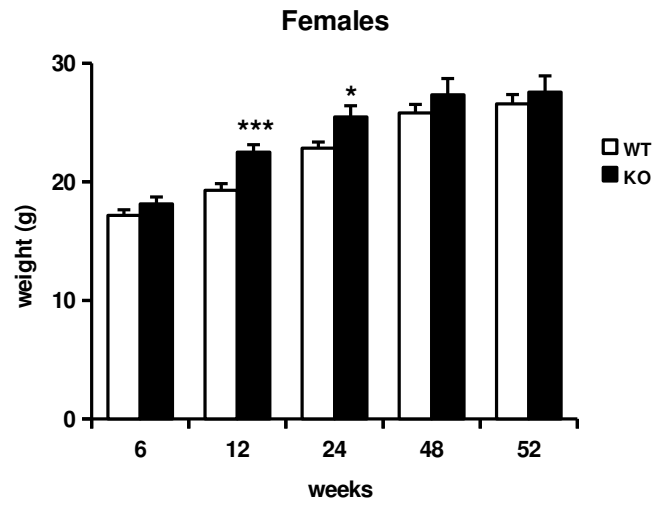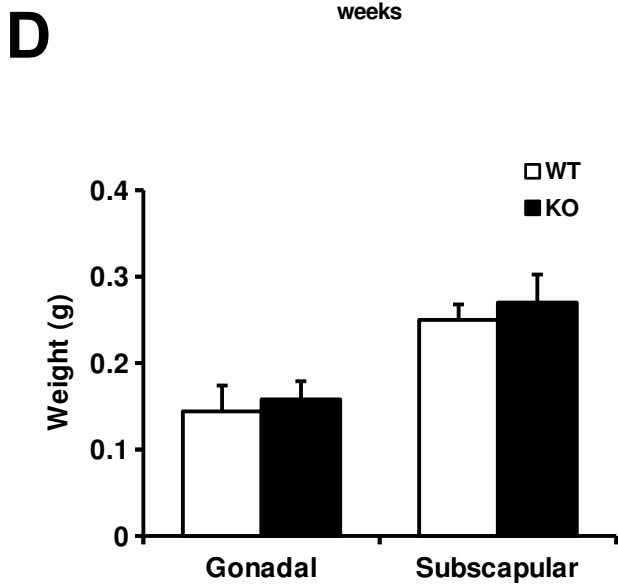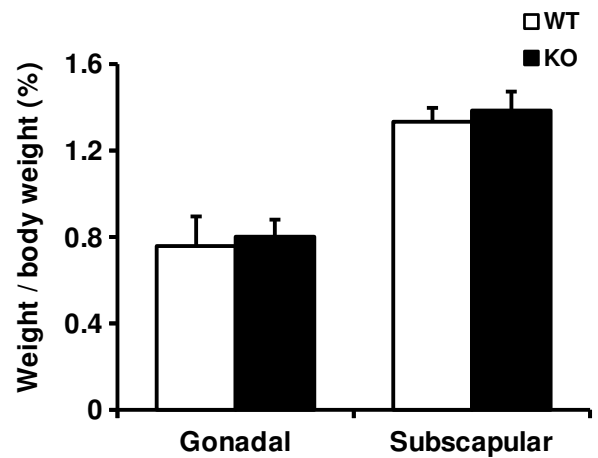

Figure S2, Quirós et al.

**A**

*Oma1*<sup>+/+</sup>

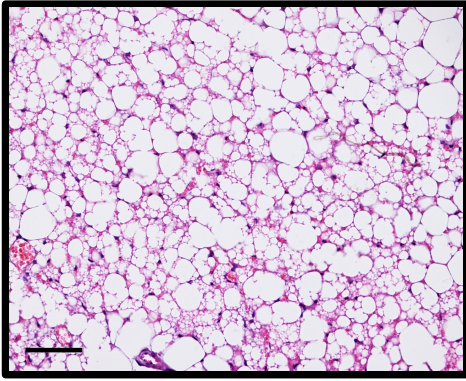

*Oma1*<sup>-/-</sup>

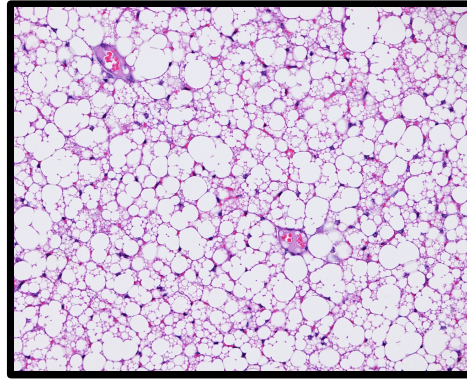

**B**

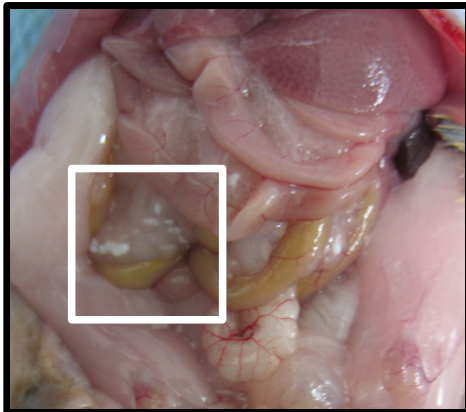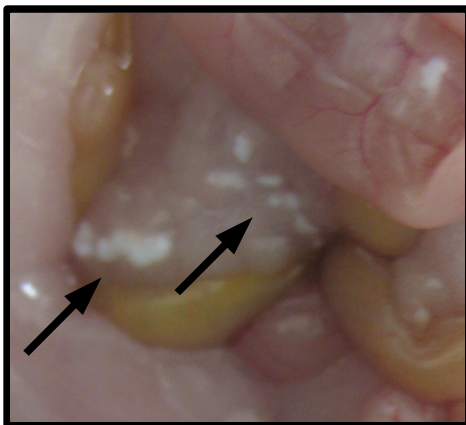

**C**

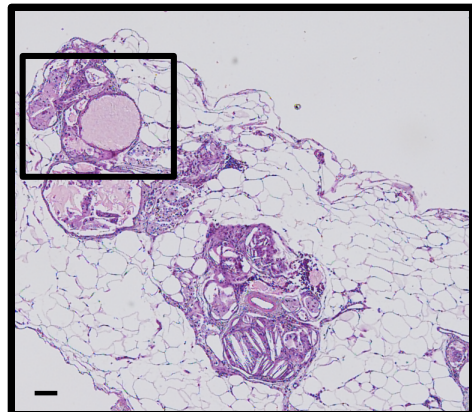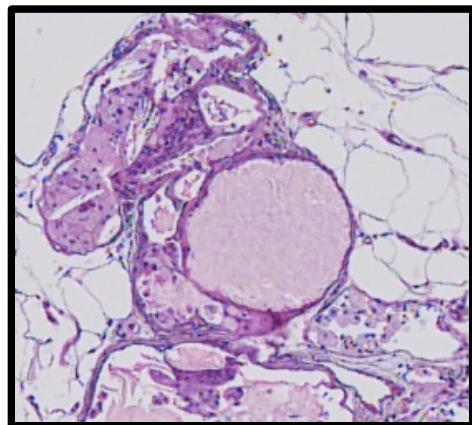

**Figure S3, Quirós et al.**



**A**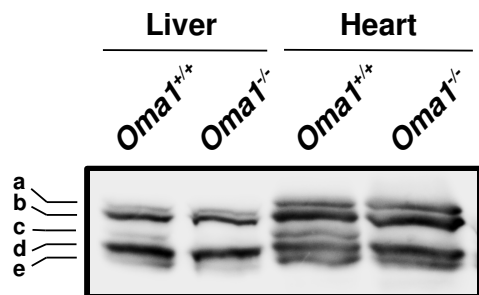**B**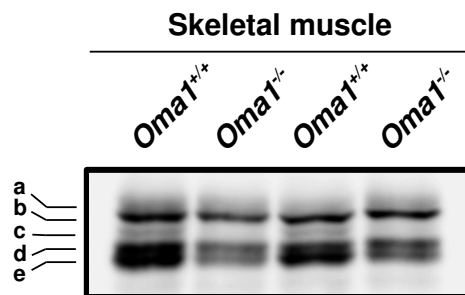**C**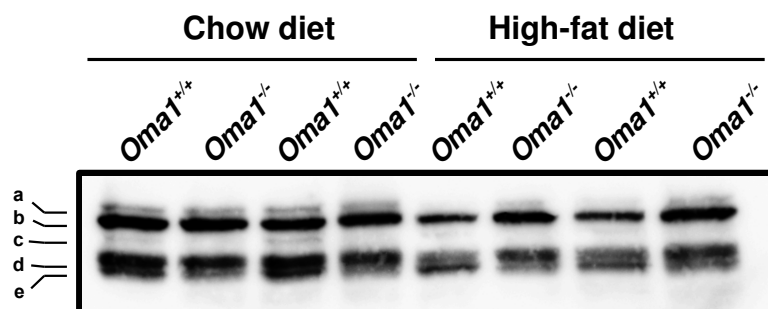**D**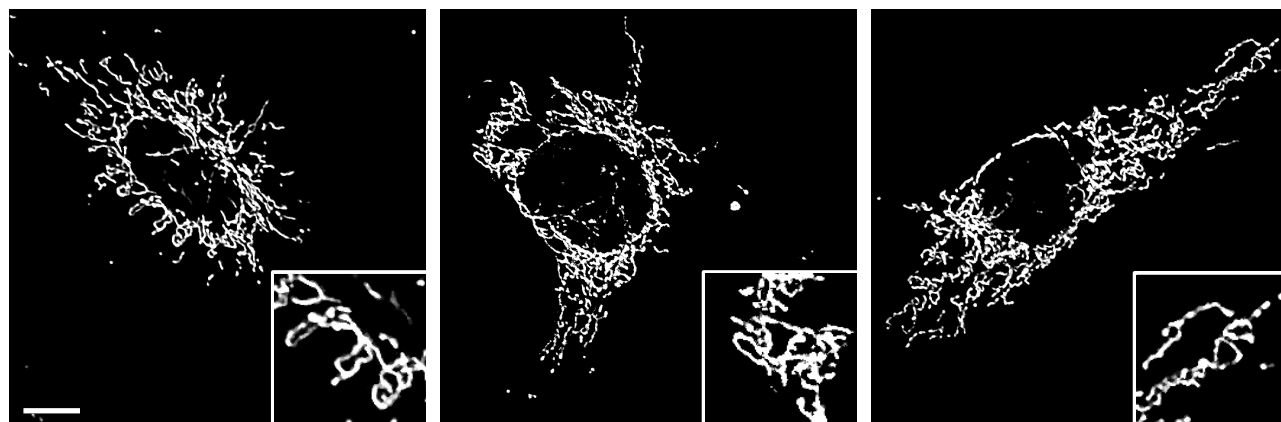

Figure S5, Quirós et al.

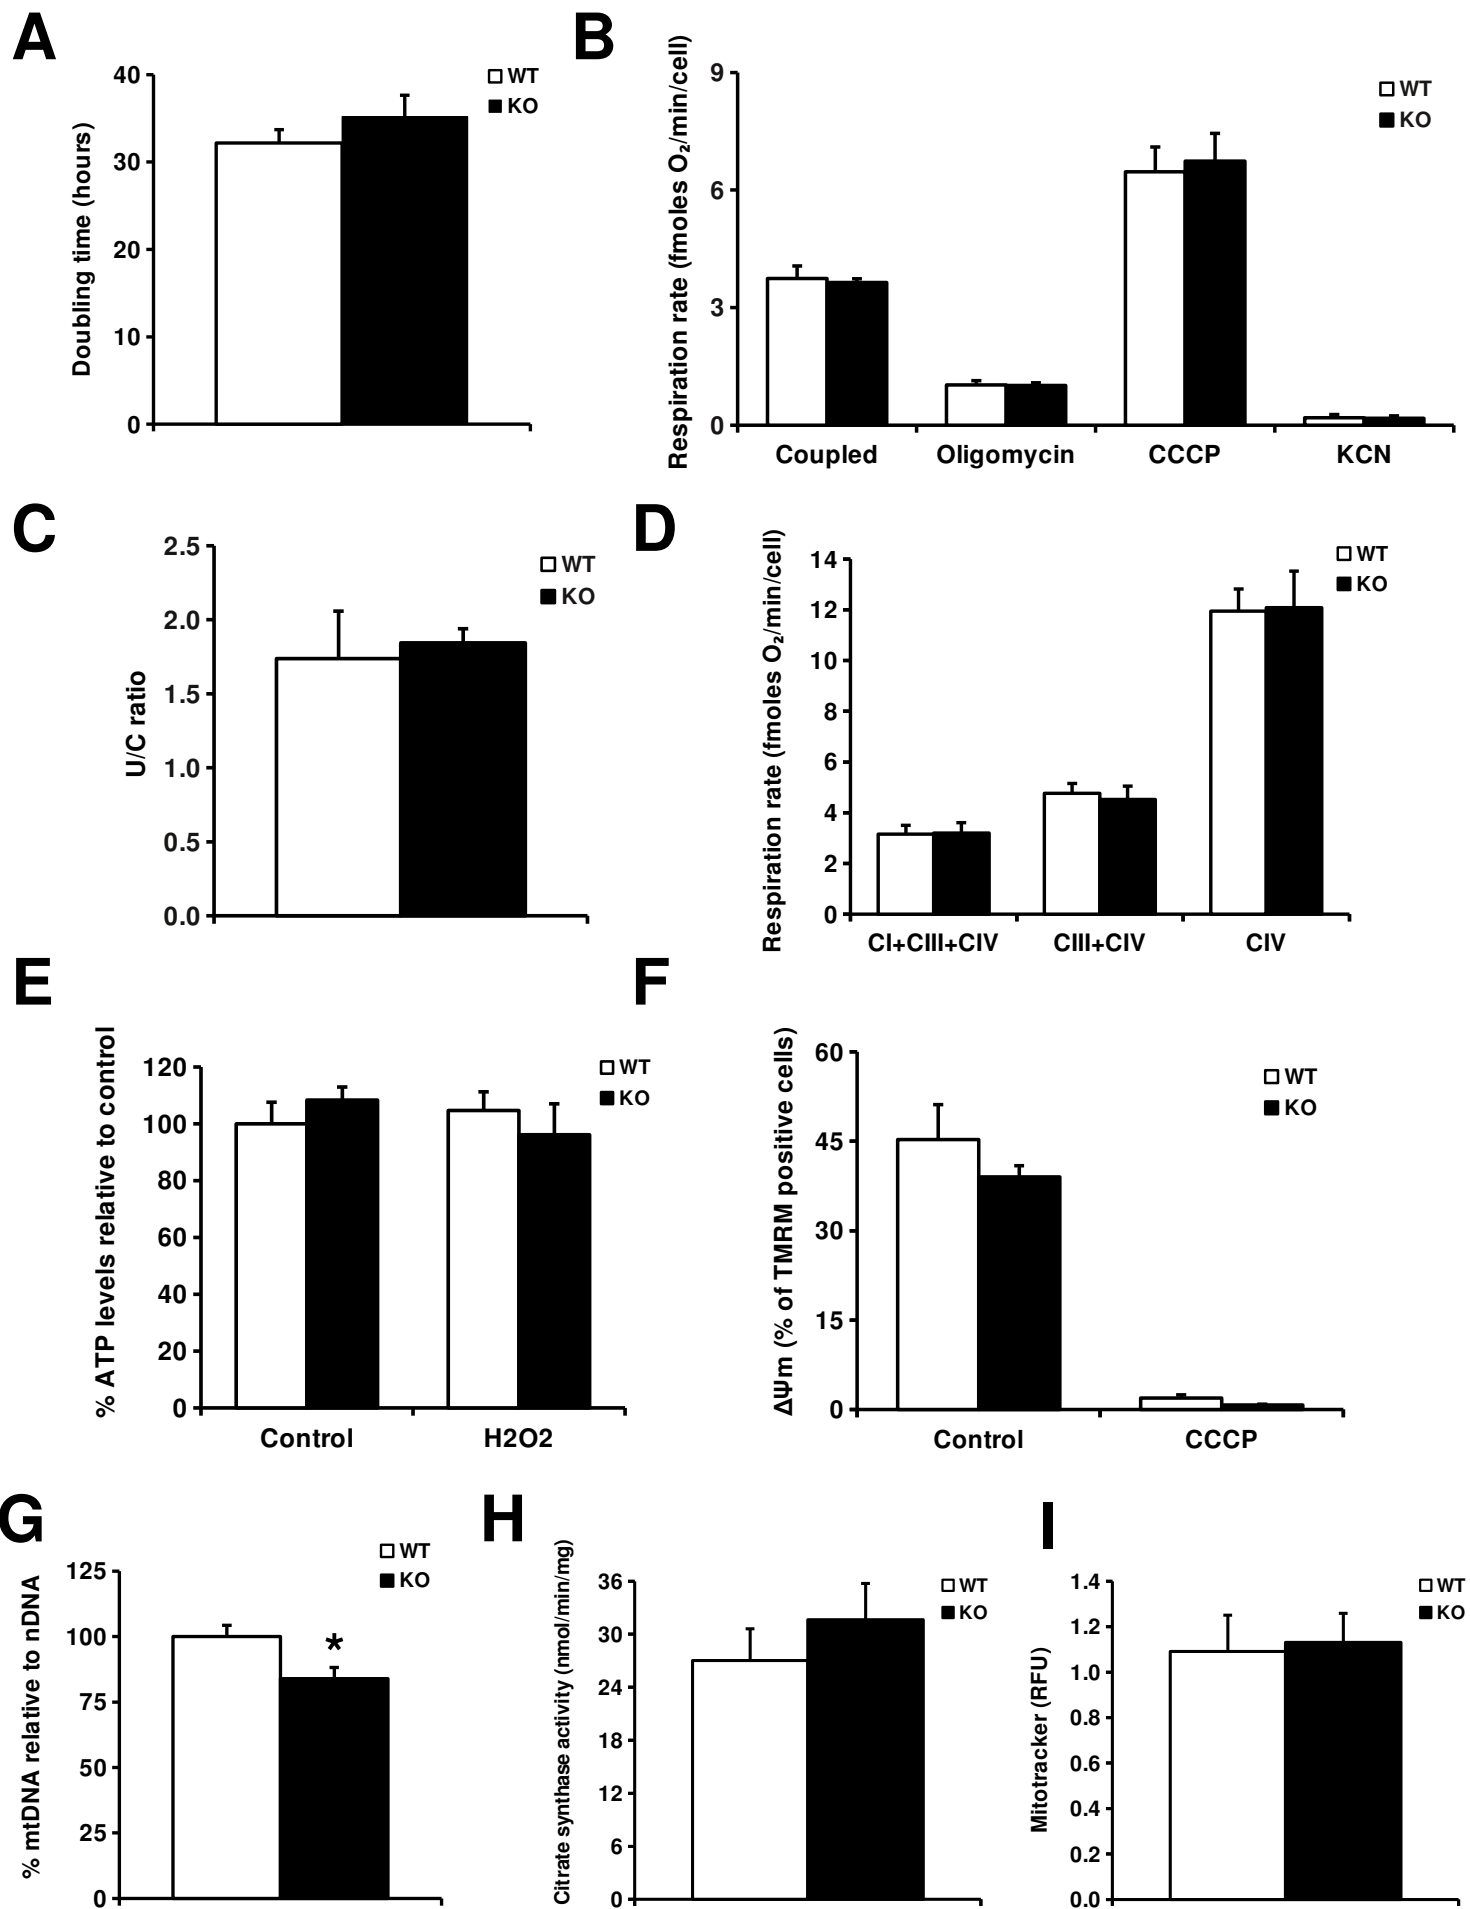

Figure S6, Quirós et al.

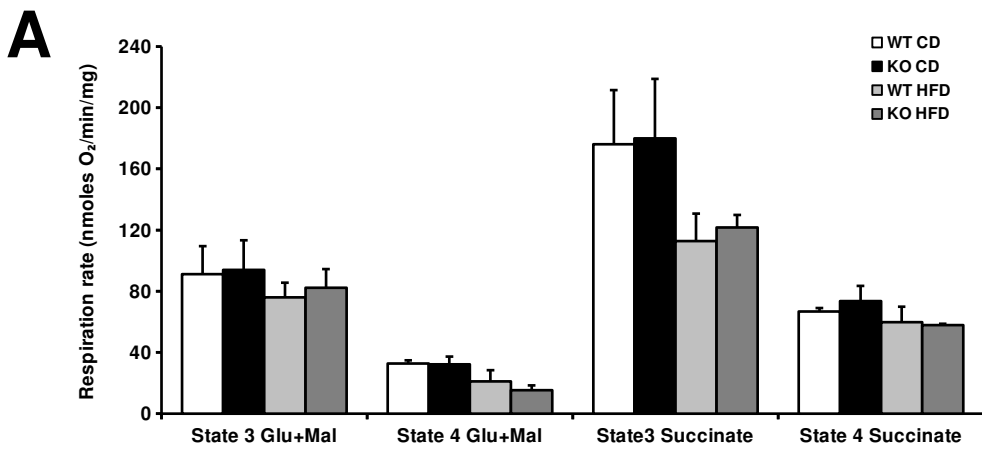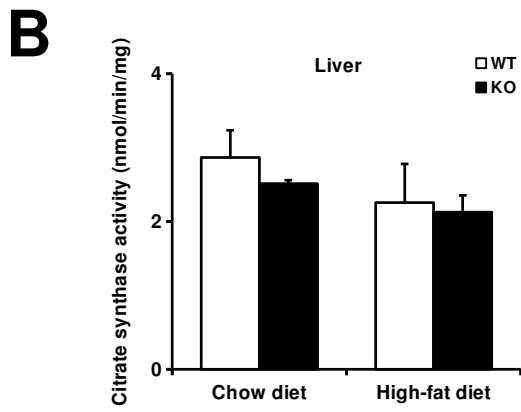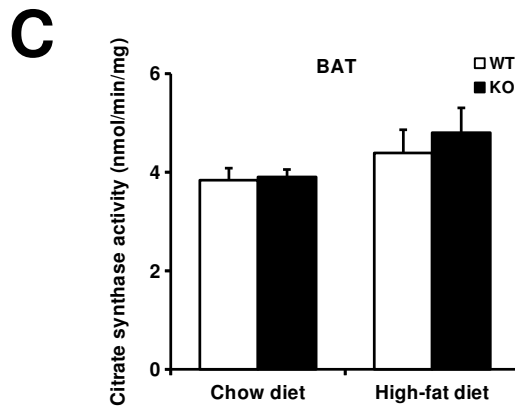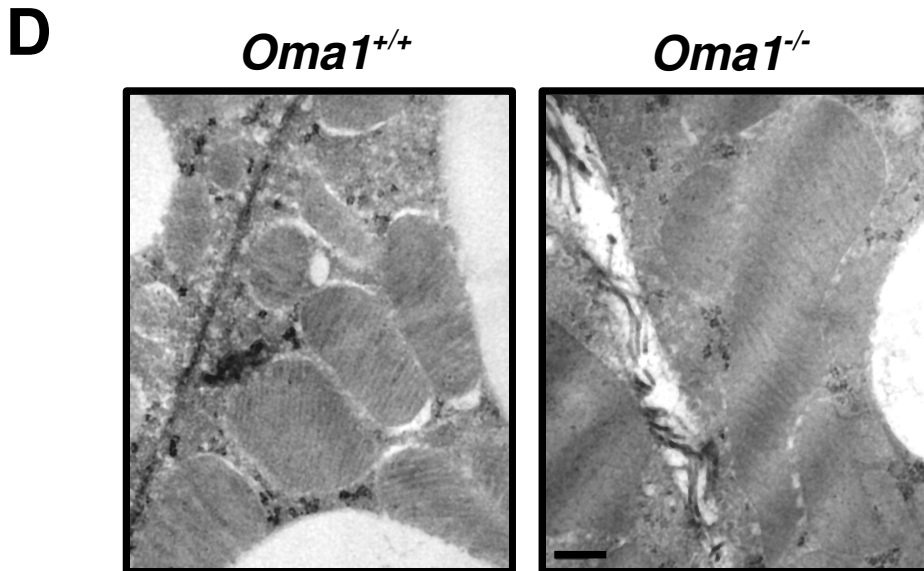

Figure S7, Quirós et al.

## SUPPLEMENTAL FIGURE LEGENDS

**Supplemental Figure 1. Targeted disruption of the mouse *Omal* gene.** (A) Schematic representation of wild-type and mutant *Omal* alleles, and the targeting vector. The exons are indicated with boxes, the bold solid lines represent introns and the thin solid lines indicate the plasmid backbone in the targeting vector. The positions of probes are indicated with solid bars and the primers with arrows. E, *Eco*RI; P, *Pvu*II; PGK-Neo-pA, neomycin selection cassette; TK, thymidine kinase marker. (B) *Pvu*II Southern blot analysis of *Omal*<sup>+/+</sup>, *Omal*<sup>+/-</sup> and *Omal*<sup>-/-</sup> mice. Substitution of exon 2 in *Omal* with the neomycin cassette changed the restriction pattern obtained after *Pvu*II digestion and hybridization with 3'-probe from 7.5 Kb in the wild-type to 4.3 kb in the knockout mice. (C) PCR genotyping of *Omal* mice with the primers shown in panel A.

**Supplemental Figure 2.** (A) Kaplan-Meier survival plot of *Omal*<sup>+/+</sup> and *Omal*<sup>-/-</sup> mice (n=26-30) (B) H&E and ubiquitin (Ub) histochemistry stain of hippocampus sections from 18-months-old *Omal*<sup>+/+</sup> and *Omal*<sup>-/-</sup> mice. Scale bar: 100  $\mu$ m. (C) Representation of weight of *Omal*<sup>+/+</sup> and *Omal*<sup>-/-</sup> mice males and females, kept on standard chow during 52 weeks. (D) Gonadal and subscapular fat mass and gonadal and subscapular fat mass as a percentage of total body weight of 4-months-old mice. (n=6)

**Supplemental Figure 3.** (A) Interscapular brown adipose tissue (BAT). H&E sections of BAT from *Omal*<sup>+/+</sup> and *Omal*<sup>-/-</sup> mice. Original magnifications 200X. Scale bar: 60  $\mu$ m. (B) Cholesterol granulomas in the *Omal*<sup>-/-</sup> mice after high-fat diet induced obesity. Necropsies of *Omal*<sup>-/-</sup> mice revealed multiple granulomas in the intestinal mesenteric fat of the most severe obese mice. Detail showing the granulomatous lesions indicated by arrows. (C) H&E section of mesenteric fat corresponding to foci of fat necrosis with foamy histiocytes, cholesterol crystals and fibrosis. Original

magnifications 200X. Scale bar: 60  $\mu\text{m}$ .

**Supplemental Figure 4. Microarray analysis of adipose tissue from *Oma1*<sup>-/-</sup> mice after high-fat diet induced obesity.** Representation of network interaction genes upregulated in *Oma1*<sup>-/-</sup> mice implicated in lipid metabolism and molecular transport. Figure was adapted from Ingenuity Pathways Analysis using genes with more than 2-fold (shown in red), and those with less than 2-fold (shown in green).

**Supplemental Figure 5. Alteration of OPA1 processing in tissues derived from *Oma1*-deficient mice.** (A) and (B) Western-blot analysis of OPA1 isoforms in different tissues extracted from *Oma1*<sup>+/+</sup> and *Oma1*<sup>-/-</sup> mice. (C) Analysis of OPA1 processing in white adipose tissue from control and high-fat diet. (D) Confocal images of *Oma1*-deficient MEFs. Scale bar: 10  $\mu\text{m}$ .

**Supplemental Figure 6. Biochemical analyses of mitochondrial function in *Oma1*<sup>-/-</sup> cells.** (A) Doubling time representation of proliferation rates during 72 h of *Oma1*<sup>+/+</sup> and *Oma1*<sup>-/-</sup> fibroblasts. (B) Representation of coupled, oligomycin-, CCCP-uncoupled and KCN-insensitivity respiration rates of *Oma1*<sup>+/+</sup> and *Oma1*<sup>-/-</sup> fibroblasts. (C) Representation of maximum respiration capacity as ratio between uncoupled and coupled respiration rate. (D) Polarography measurements of respiration rates of mitochondrial complex I, III and IV; III and IV; and IV, indicated as fmol O<sub>2</sub>/min/cell, determined in digitonin-permeabilized *Oma1*<sup>+/+</sup> and *Oma1*<sup>-/-</sup> fibroblasts. (E) ATP levels represented as percentage relative to control fibroblasts in basal conditions and after treatment with 100  $\mu\text{M}$  H<sub>2</sub>O<sub>2</sub> during 5 h. (F) Mitochondrial membrane potential ( $\Delta\Psi\text{m}$ ), represented as a percentage of positive cells, measured by flow cytometry using FL2, after treatment with 200 nM TMRM for 15 min at 37 °C. For negative control we added 20  $\mu\text{M}$  of CCCP, 30 min before treatment with TMRM. (G) Representation of the percentage levels of mitochondrial DNA (mtDNA) relative to nuclear DNA (nDNA) of



*Omal*<sup>+/+</sup> and *Omal*<sup>-/-</sup> fibroblasts. (H) Citrate synthase activity measurement as a marker of mitochondrial mass. (I) Representation of Mitotracker-Red signal in relative fluorescence units (RFU) as another marker of mitochondrial mass, measured by flow cytometry using FL3 and after treatment with 100 nM of Mitotracker-Red for 15 min at 37 °C. All experiments were carried out in at least two independent experiments with 3 different fibroblast cell lines per genotype. Error bars represent SEM. \*  $P < 0.05$ .

**Supplemental Figure 7.** (A) Respiration rate of state 3 and 4, using glutamate+malate or succinate, measured in mitochondria isolated from liver of *Omal*<sup>+/+</sup> and *Omal*<sup>-/-</sup> mice on control and high-fat diet. Citrate synthase activity of (B) liver and (C) BAT homogenates used for palmitate oxidation measurements. Bars represent means  $\pm$  SEM (n=4). (D) Representative image of mega-mitochondria from EM analysis of BAT samples in control temperature from *Omal*<sup>-/-</sup> mice compared to control. Scale bar 0.4  $\mu$ m.

## **SUPPLEMENTAL TABLES**

**Supplemental Table 1.** Affymetrix Mouse Gene 1.0 ST probes showing a greater than 2-fold increase or decrease in adipose tissue from Oma1-deficient mice were sorted by fold-change.

| ID       | Gene Symbol  | Gene name                                                                   | WT Signal | KO Signal | Fold  |
|----------|--------------|-----------------------------------------------------------------------------|-----------|-----------|-------|
| 10420616 | Sgcg         | sarcoglycan, gamma (dystrophin-associated glycoprotein)                     | 32        | 1042      | 32.59 |
| 10545180 | Gm10879      | predicted gene 10879                                                        | 74        | 818       | 10.98 |
| 10545220 | Igk          | immunoglobulin kappa chain complex                                          | 87        | 640       | 7.37  |
| 10513497 | Mup2         | major urinary protein 2                                                     | 689       | 3835      | 5.56  |
| 10513521 | Mup20        | major urinary protein 20                                                    | 215       | 1082      | 5.02  |
| 10608377 | LOC382133    | similar to RIKEN cDNA 1700029H17                                            | 29        | 140       | 4.80  |
| 10513420 | Mup7         | major urinary protein 7                                                     | 1258      | 5923      | 4.71  |
| 10608452 | LOC100041256 | hypothetical protein LOC100041256                                           | 30        | 139       | 4.70  |
| 10403069 | Igh-6        | immunoglobulin heavy chain 6 (heavy chain of IgM)                           | 18        | 79        | 4.41  |
| 10608608 | Ssty2        | spermiogenesis specific transcript on the Y 2                               | 23        | 102       | 4.36  |
| 10608327 | LOC100040031 | hypothetical protein LOC100040031                                           | 29        | 125       | 4.35  |
| 10545249 | LOC676175    | similar to Ig kappa chain V-V region MPC11 precursor                        | 21        | 90        | 4.20  |
| 10608477 | LOC434960    | similar to spermiogenesis specific transcript on the Y 2                    | 23        | 97        | 4.20  |
| 10608295 | LOC100039753 | similar to putative                                                         | 34        | 143       | 4.18  |
| 10608484 | MGC107098    | similar to spermiogenesis specific transcript on the Y 2                    | 22        | 89        | 4.13  |
| 10608480 | LOC100039147 | similar to spermiogenesis specific transcript on the Y 1                    | 34        | 138       | 4.03  |
| 10349968 | Chi31        | chitinase 3-like 1                                                          | 81        | 324       | 4.03  |
| 10560744 | V1rd15       | vomer nasal 1 receptor, D15                                                 | 21        | 85        | 3.99  |
| 10513529 | Mup3         | major urinary protein 3                                                     | 119       | 473       | 3.98  |
| 10608506 | LOC100039614 | hypothetical protein LOC100039614                                           | 25        | 99        | 3.96  |
| 10403034 | Igh          | immunoglobulin heavy chain complex                                          | 198       | 754       | 3.81  |
| 10560752 | V1rd14       | vomer nasal 1 receptor, D14                                                 | 27        | 101       | 3.79  |
| 10513512 | Mup1         | major urinary protein 1                                                     | 357       | 1349      | 3.78  |
| 10531149 | Gc           | group specific component                                                    | 339       | 1252      | 3.69  |
| 10585005 | Apoa1        | apolipoprotein A-I                                                          | 253       | 904       | 3.57  |
| 10507143 | Cyp4a12a     | cytochrome P450, family 4, subfamily a, polypeptide 12a                     | 29        | 103       | 3.51  |
| 10403057 | LOC641089    | similar to Ig heavy chain V region BCL1 precursor                           | 17        | 57        | 3.41  |
| 10547633 | Gdf3         | growth differentiation factor 3                                             | 140       | 460       | 3.30  |
| 10545215 | Igk-V28      | immunoglobulin kappa chain variable 28 (V28)                                | 105       | 323       | 3.09  |
| 10349648 | Ctse         | cathepsin E                                                                 | 105       | 322       | 3.07  |
| 10585010 | Apoa4        | apolipoprotein A-IV                                                         | 200       | 609       | 3.04  |
| 10560780 | V1rd21       | vomer nasal 1 receptor, D21                                                 | 18        | 54        | 3.04  |
| 10403011 | LOC674190    | similar to Ig heavy chain V region IR2 precursor                            | 22        | 65        | 3.03  |
| 10608549 | LOC100042428 | spermiogenesis specific transcript on the Y 2-like                          | 25        | 76        | 3.01  |
| 10551293 | Cyp2f2       | cytochrome P450, family 2, subfamily f, polypeptide 2                       | 138       | 410       | 2.98  |
| 10608277 | LOC100041207 | similar to MGC107098 protein                                                | 19        | 56        | 2.93  |
| 10531041 | Ugt2b1       | UDP glucuronosyltransferase 2 family, polypeptide B1                        | 24        | 67        | 2.80  |
| 10373330 | Rdh7         | retinol dehydrogenase 7                                                     | 58        | 161       | 2.76  |
| 10509500 | Hp1bp3       | heterochromatin protein 1, binding protein 3                                | 350       | 964       | 2.76  |
| 10523062 | Alb          | albumin                                                                     | 1692      | 4523      | 2.67  |
| 10571467 | Pdgfrl       | platelet-derived growth factor receptor-like                                | 57        | 151       | 2.67  |
| 10583071 | Mmp3         | matrix metalloproteinase 3                                                  | 51        | 131       | 2.59  |
| 10434719 | Kng1         | kininogen 1                                                                 | 221       | 568       | 2.57  |
| 10512904 | Aldob        | aldolase B, fructose-bisphosphate                                           | 128       | 328       | 2.57  |
| 10456392 | Cidea        | cell death-inducing DNA fragmentation factor, alpha subunit-like effector A | 84        | 213       | 2.55  |
| 10575693 | Vat1l        | vesicle amine transport protein 1 homolog-like (T. californica)             | 54        | 136       | 2.54  |
| 10372652 | Lyz1         | lysozyme 1                                                                  | 510       | 1291      | 2.53  |
| 10430297 | Pvalb        | parvalbumin                                                                 | 44        | 110       | 2.50  |
| 10545205 | Gm1418       | predicted gene 1418                                                         | 109       | 268       | 2.47  |
| 10566477 | Hpx          | hemopexin                                                                   | 394       | 963       | 2.44  |
| 10497451 | Cpa3         | carboxypeptidase A3, mast cell                                              | 282       | 663       | 2.35  |
| 10531051 | Ugt2b36      | UDP glucuronosyltransferase 2 family, polypeptide B36                       | 35        | 82        | 2.34  |
| 10574598 | Es31         | esterase 31                                                                 | 116       | 270       | 2.32  |
| 10513630 | Ambp         | alpha 1 microglobulin/bikunin                                               | 97        | 225       | 2.32  |
| 10608346 | LOC665346    | similar to spermiogenesis specific transcript on the Y 1                    | 18        | 42        | 2.30  |
| 10538882 | Gm5571       | predicted gene 5571                                                         | 736       | 1689      | 2.29  |
| 10550778 | LOC100043604 | V3R8-like protein                                                           | 23        | 53        | 2.29  |
| 10535704 | Cyp3a11      | cytochrome P450, family 3, subfamily a, polypeptide 11                      | 35        | 80        | 2.25  |
| 10394394 | Apob         | apolipoprotein B                                                            | 109       | 246       | 2.25  |
| 10608212 | Sly          | Sycp3 like Y-linked                                                         | 20        | 45        | 2.23  |
| 10538880 | Igk-V1       | immunoglobulin kappa chain variable 1 (V1)                                  | 143       | 315       | 2.21  |
| 10507152 | Cyp4a12b     | cytochrome P450, family 4, subfamily a, polypeptide 12B                     | 32        | 70        | 2.21  |
| 10608482 | LOC665746    | similar to spermiogenesis specific transcript on the Y 1                    | 20        | 45        | 2.20  |
| 10608251 | LOC380994    | similar to Sycp3 like Y-linked                                              | 17        | 37        | 2.19  |

|          |              |                                                                                                 |     |     |      |
|----------|--------------|-------------------------------------------------------------------------------------------------|-----|-----|------|
| 10538965 | Fabp1        | fatty acid binding protein 1, liver                                                             | 136 | 296 | 2.18 |
| 10598225 | Gmcl11       | germ cell-less homolog 1 (Drosophila)-like                                                      | 15  | 33  | 2.18 |
| 10593169 | Apoc3        | apolipoprotein C-III                                                                            | 252 | 543 | 2.15 |
| 10548207 | Pzp          | pregnancy zone protein                                                                          | 187 | 402 | 2.15 |
| 10387855 | Alox15       | arachidonate 15-lipoxygenase                                                                    | 125 | 269 | 2.15 |
| 10608424 | Ssty1        | spermiogenesis specific transcript on the Y 1                                                   | 18  | 38  | 2.14 |
| 10436773 | Gm7735       | predicted gene 7735                                                                             | 52  | 111 | 2.12 |
| 10608247 | LOC100042196 | similar to spermiogenesis specific transcript on the Y 1                                        | 20  | 42  | 2.11 |
| 10545217 | LOC100046973 | similar to [Human Ig rearranged gamma chain mRNA, V-J-C region and complete cds.], gene product | 19  | 40  | 2.10 |
| 10591135 | Fat3         | FAT tumor suppressor homolog 3 (Drosophila)                                                     | 166 | 349 | 2.10 |
| 10583809 | Cnn1         | calponin 1                                                                                      | 96  | 201 | 2.10 |
| 10474497 | Olf1287      | olfactory receptor 1287                                                                         | 14  | 29  | 2.10 |
| 10608488 | LOC665128    | similar to spermiogenesis specific transcript on the Y 1                                        | 23  | 48  | 2.10 |
| 10545202 | Gm1077       | predicted gene 1077                                                                             | 66  | 138 | 2.09 |
| 10584252 | Gm9513       | predicted gene 9513                                                                             | 209 | 437 | 2.09 |
| 10561162 | Cyp2a22      | cytochrome P450, family 2, subfamily a, polypeptide 22                                          | 17  | 35  | 2.07 |
| 10351546 | Apoa2        | apolipoprotein A-II                                                                             | 345 | 715 | 2.07 |
| 10545200 | LOC100046894 | similar to Igk-C protein                                                                        | 69  | 143 | 2.06 |
| 10608350 | LOC100039552 | similar to spermiogenesis specific transcript on the Y 1                                        | 19  | 39  | 2.04 |
| 10507163 | Cyp4a10      | cytochrome P450, family 4, subfamily a, polypeptide 10                                          | 27  | 55  | 2.03 |
| 10598863 | Rgn          | regucalcin                                                                                      | 25  | 50  | 2.03 |

| ID       | Gene Symbol   | Gene Name                                                                                               | WT Signal | KO Signal | Fold  |
|----------|---------------|---------------------------------------------------------------------------------------------------------|-----------|-----------|-------|
| 10600024 | Gpr50         | G-protein-coupled receptor 50                                                                           | 550       | 62        | -8.85 |
| 10415081 | EG665955      | predicted gene, EG665955                                                                                | 1197      | 148       | -8.11 |
| 10504178 | 4933409K07Rik | RIKEN cDNA 4933409K07 gene                                                                              | 667       | 101       | -6.62 |
| 10559796 | Peg3          | paternally expressed 3                                                                                  | 1277      | 319       | -4.01 |
| 10584572 | Hspa8         | heat shock protein 8                                                                                    | 7865      | 2009      | -3.92 |
| 10538924 | LOC100046496  | similar to Ig kappa V-region 24B                                                                        | 1597      | 429       | -3.72 |
| 10508800 | LOC433762     | hypothetical gene LOC433762                                                                             | 1712      | 482       | -3.55 |
| 10505451 | Orm2          | orosomuroid 2                                                                                           | 342       | 98        | -3.47 |
| 10496457 | Adh6b         | alcohol dehydrogenase 6B (class V)                                                                      | 171       | 50        | -3.43 |
| 10602896 | Gpr64         | G protein-coupled receptor 64                                                                           | 355       | 103       | -3.43 |
| 10362440 | Trdn          | triadin                                                                                                 | 104       | 31        | -3.36 |
| 10553533 | Gm6181        | predicted gene 6181                                                                                     | 221       | 72        | -3.09 |
| 10531987 | Gbp4          | guanylate binding protein 4                                                                             | 729       | 236       | -3.09 |
| 10421106 | Adam7         | a disintegrin and metallopeptidase domain 7                                                             | 62        | 21        | -3.02 |
| 10399428 | Snord118      | small nucleolar RNA, C/D box 118                                                                        | 320       | 108       | -2.97 |
| 10545231 | LOC100047053  | similar to monoclonal antibody kappa light chain                                                        | 818       | 277       | -2.96 |
| 10585068 | Fam55d        | family with sequence similarity 55, member D                                                            | 277       | 95        | -2.93 |
| 10506225 | Cachd1        | cache domain containing 1                                                                               | 985       | 339       | -2.90 |
| 10562169 | Hamp          | hepcidin antimicrobial peptide                                                                          | 100       | 34        | -2.90 |
| 10429588 | 9030619P08Rik | RIKEN cDNA 9030619P08 gene                                                                              | 153       | 53        | -2.89 |
| 10606178 | Xist          | inactive X specific transcripts                                                                         | 59        | 21        | -2.79 |
| 10583133 | Mmp7          | matrix metallopeptidase 7                                                                               | 116       | 42        | -2.76 |
| 10398032 | Serpina3b     | serine (or cysteine) peptidase inhibitor, clade A, member 3B                                            | 158       | 57        | -2.76 |
| 10474096 | Lrrc4c        | leucine rich repeat containing 4C                                                                       | 200       | 75        | -2.66 |
| 10567518 | Dnahc3        | dynein, axonemal, heavy chain 3                                                                         | 73        | 28        | -2.58 |
| 10564165 | Snord116      | small nucleolar RNA, C/D box 116 cluster                                                                | 119       | 46        | -2.58 |
| 10501199 | Gstm7         | glutathione S-transferase, mu 7                                                                         | 903       | 358       | -2.52 |
| 10376366 | 2210415F13Rik | RIKEN cDNA 2210415F13 gene                                                                              | 74        | 30        | -2.47 |
| 10568502 | Cuzd1         | CUB and zona pellucida-like domains 1                                                                   | 79        | 33        | -2.43 |
| 10347915 | Gm7609        | predicted gene 7609                                                                                     | 713       | 295       | -2.42 |
| 10429029 | Adcy8         | adenylate cyclase 8                                                                                     | 62        | 26        | -2.38 |
| 10421186 | Gm10002       | predicted gene 10002                                                                                    | 37        | 16        | -2.36 |
| 10566326 | Trim12        | tripartite motif-containing 12                                                                          | 230       | 98        | -2.35 |
| 10500529 | Phgdh         | 3-phosphoglycerate dehydrogenase                                                                        | 711       | 304       | -2.34 |
| 10582879 | Csprs         | component of Sp100-rs                                                                                   | 521       | 228       | -2.28 |
| 10552594 | Klk1b22       | kallikrein 1-related peptidase b22                                                                      | 48        | 21        | -2.28 |
| 10403043 | Igh           | immunoglobulin heavy chain complex                                                                      | 1740      | 766       | -2.27 |
| 10385518 | Tgtp          | T-cell specific GTPase                                                                                  | 507       | 224       | -2.26 |
| 10462313 | Slc1a1        | solute carrier family 1 (neuronal/epithelial high affinity glutamate transporter, system Xag), member 1 | 184       | 82        | -2.25 |
| 10374183 | Gm4638        | predicted gene 4638                                                                                     | 129       | 58        | -2.22 |
| 10345436 | LOC280487     | pol polyprotein                                                                                         | 129       | 58        | -2.22 |
| 10414537 | Ang           | angiogenin, ribonuclease, RNase A family, 5                                                             | 1125      | 508       | -2.21 |
| 10596279 | Dnajc13       | DnaJ (Hsp40) homolog, subfamily C, member 13                                                            | 89        | 40        | -2.20 |
| 10505445 | Orm3          | orosomuroid 3                                                                                           | 76        | 35        | -2.18 |
| 10551025 | Cd79a         | CD79A antigen (immunoglobulin-associated alpha)                                                         | 163       | 75        | -2.16 |
| 10359593 | Fmo3          | flavin containing monooxygenase 3                                                                       | 186       | 87        | -2.14 |
| 10419578 | Ndrp2         | N-myc downstream regulated gene 2                                                                       | 4059      | 1906      | -2.13 |
| 10600093 | Zfp185        | zinc finger protein 185                                                                                 | 172       | 81        | -2.11 |
| 10403291 | Akr1c14       | aldo-keto reductase family 1, member C14                                                                | 161       | 77        | -2.10 |
| 10566585 | Gm1966        | predicted gene 1966                                                                                     | 156       | 75        | -2.09 |
| 10422635 | C6            | complement component 6                                                                                  | 1718      | 828       | -2.08 |
| 10545210 | Gm1524        | predicted gene 1524                                                                                     | 157       | 76        | -2.06 |
| 10448079 | Gm6686        | predicted gene 6686                                                                                     | 199       | 97        | -2.06 |
| 10555736 | Olf558        | olfactory receptor 558                                                                                  | 316       | 155       | -2.04 |
| 10571752 | Dctd          | dCMP deaminase                                                                                          | 224       | 110       | -2.03 |
| 10455970 | BC023105      | cDNA sequence BC023105                                                                                  | 116       | 57        | -2.03 |
| 10455961 | Ilgp1         | interferon inducible GTPase 1                                                                           | 319       | 158       | -2.02 |
| 10469936 | Nrarp         | Notch-regulated ankyrin repeat protein                                                                  | 212       | 105       | -2.02 |
| 10447649 | Fndc1         | fibronectin type III domain containing 1                                                                | 353       | 175       | -2.02 |
| 10359689 | Atp1b1        | ATPase, Na <sup>+</sup> /K <sup>+</sup> transporting, beta 1 polypeptide                                | 352       | 175       | -2.01 |
| 10586591 | Car12         | carbonic anhydrase 12                                                                                   | 88        | 44        | -2.01 |
| 10594802 | B230380D07Rik | RIKEN cDNA B230380D07 gene                                                                              | 387       | 193       | -2.01 |
| 10556962 | Vwa3a         | von Willebrand factor A domain containing 3A                                                            | 101       | 50        | -2.01 |
| 10565910 | Plekhh1       | pleckstrin homology domain containing, family B (evectins) member 1                                     | 111       | 55        | -2.01 |
| 10559790 | Zim1          | zinc finger, imprinted 1                                                                                | 68        | 34        | -2.00 |
| 10460251 | 1700055N04Rik | RIKEN cDNA 1700055N04 gene                                                                              | 212       | 106       | -2.00 |
| 10500268 | Mrps21        | mitochondrial ribosomal protein S21                                                                     | 2228      | 1115      | -2.00 |

**Supplemental Table 2. Expression of mitochondrial genes in skeletal muscle and white adipose tissue of *Oma1<sup>+/+</sup>* and *Oma1<sup>-/-</sup>* under high-fat diet.**

|                               | Skeletal muscle           |                           | WAT                       |                           |
|-------------------------------|---------------------------|---------------------------|---------------------------|---------------------------|
|                               | <i>Oma1<sup>+/+</sup></i> | <i>Oma1<sup>-/-</sup></i> | <i>Oma1<sup>+/+</sup></i> | <i>Oma1<sup>-/-</sup></i> |
| <b>Mitochondrial dynamics</b> |                           |                           |                           |                           |
| <i>Mfn2</i>                   | 1 ± 0.09                  | 0.83 ± 0.04               | 1 ± 0.11                  | 0.68 ± 0.07 *             |
| <i>Opa1</i>                   | 1 ± 0.08                  | 0.76 ± 0.05 *             | 1 ± 0.07                  | 0.77 ± 0.10 *             |
| <i>Drp1</i>                   | 1 ± 0.08                  | 0.77 ± 0.06 *             | 1 ± 0.12                  | 0.83 ± 0.15               |
| <b>OXPPOS genes</b>           |                           |                           |                           |                           |
| <i>Pgc1a</i>                  | 1 ± 0.07                  | 0.91 ± 0.07               |                           |                           |
| <i>Ndufa9</i>                 | 1 ± 0.04                  | 0.91 ± 0.07               |                           |                           |
| <i>Sdha</i>                   | 1 ± 0.06                  | 0.82 ± 0.06 *             |                           |                           |
| <i>Uqcrc2</i>                 | 1 ± 0.03                  | 0.91 ± 0.09               |                           |                           |
| <i>CoxIV</i>                  | 1 ± 0.05                  | 0.90 ± 0.09               |                           |                           |
| <i>Atp5a1</i>                 | 1 ± 0.03                  | 0.82 ± 0.05 *             |                           |                           |
| <i>Cpt1b</i>                  | 1 ± 0.05                  | 0.91 ± 0.06               |                           |                           |

Gene expression relative to beta-actin. Data represent mean ± SEM of at least five mice per group. \* P< 0.05; \*\* P< 0.01
