# Supplementary material
Source: PubMed Central journal article supplement (PMC3343468)

# Figure 4

**A**

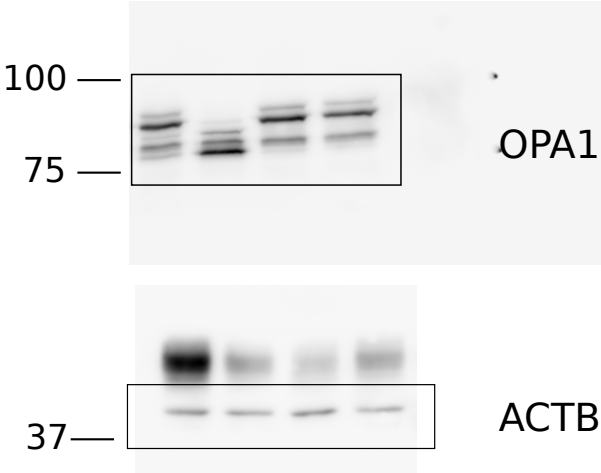

**B**

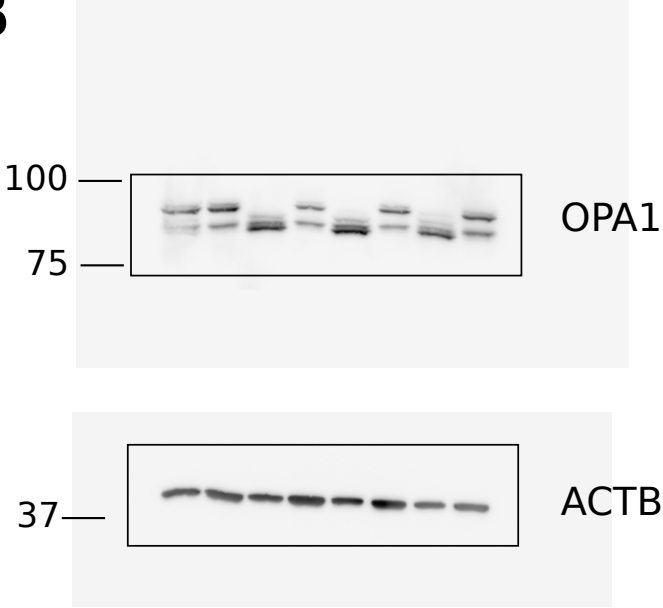

**G**

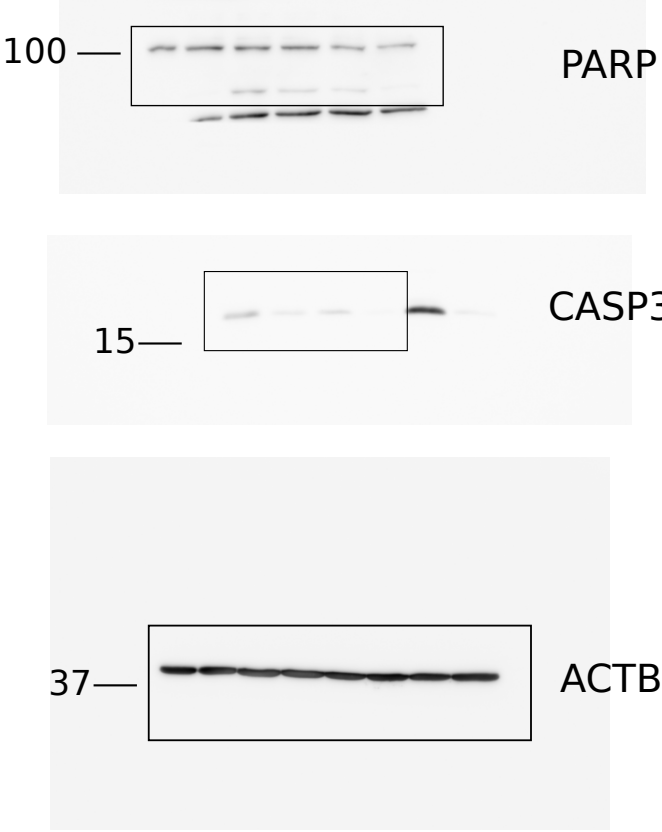

Supplement: emboj201270s2.pdf [file emboj201270s2.pdf]

# Figure 5

**H**

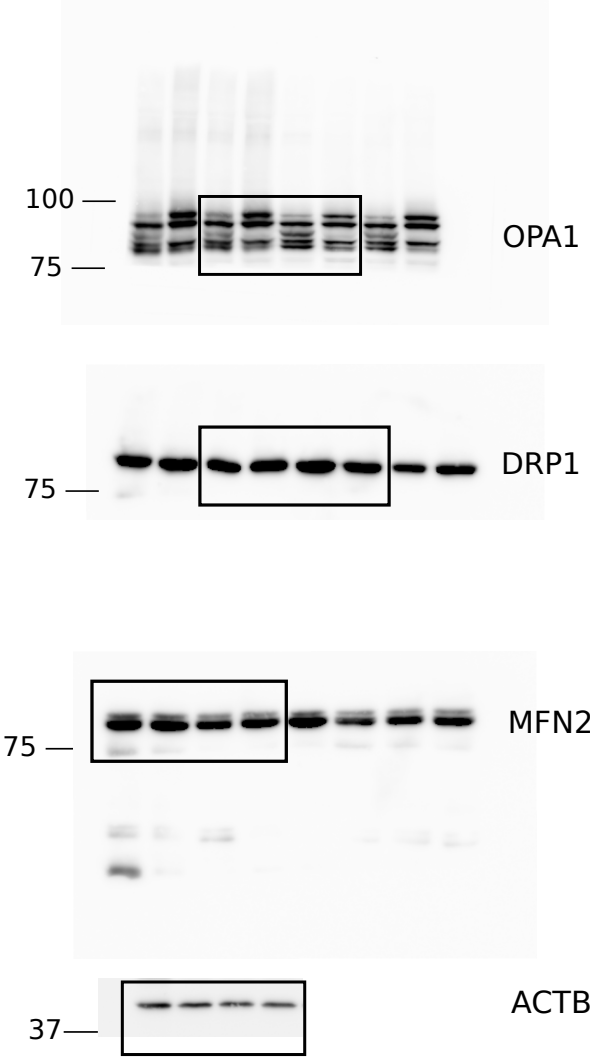

Supplement: emboj201270s3.pdf [file emboj201270s3.pdf]

# Figure 6

**B**

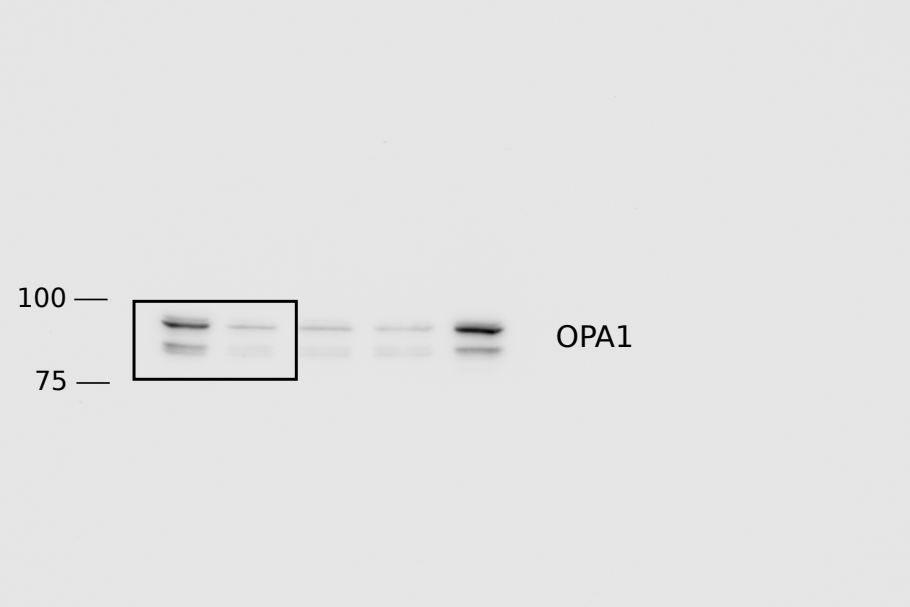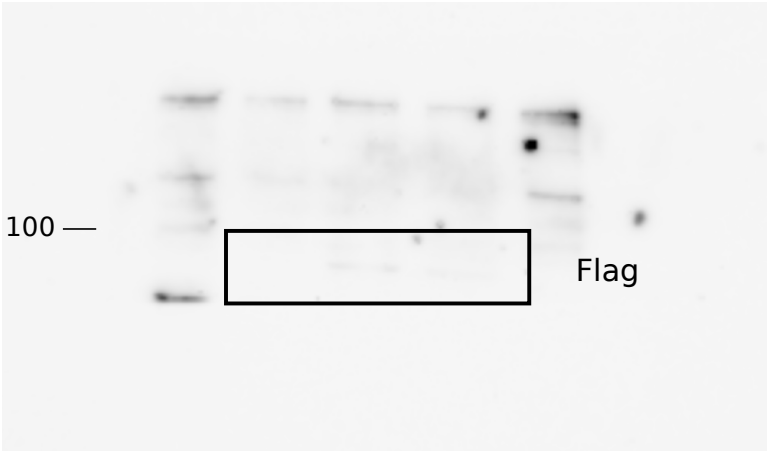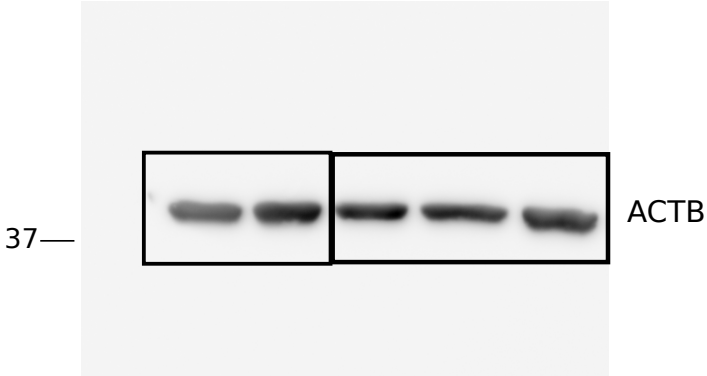

Supplement: emboj201270s4.pdf [file emboj201270s4.pdf]

# Figure S1

**B**

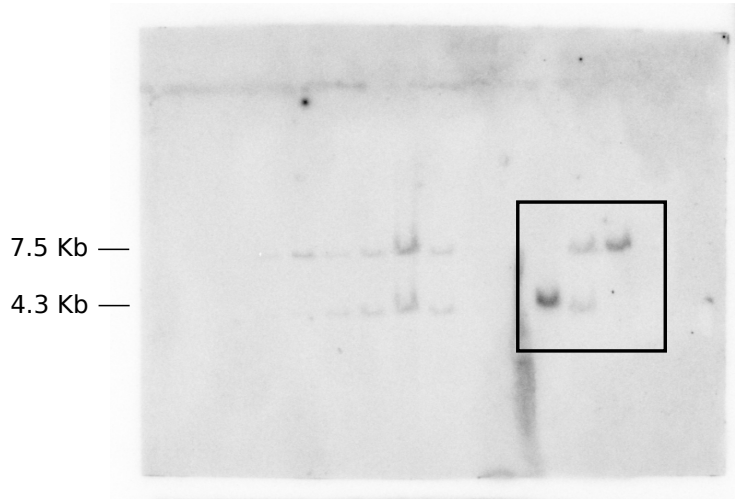

**C**

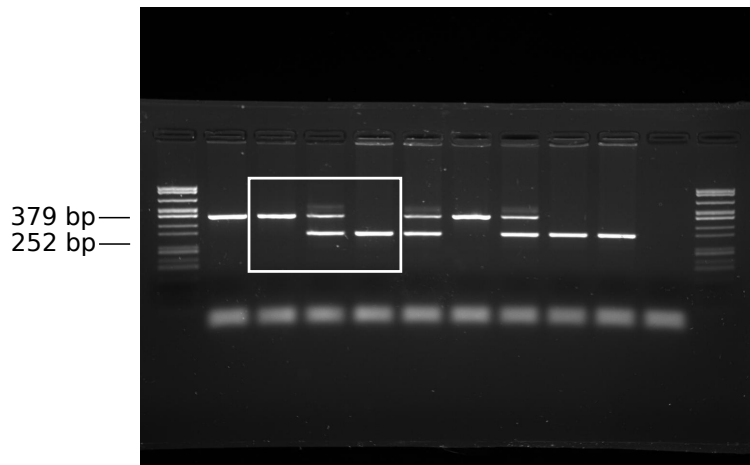

Supplement: emboj201270s5.pdf [file emboj201270s5.pdf]

# Figure S5

**A**

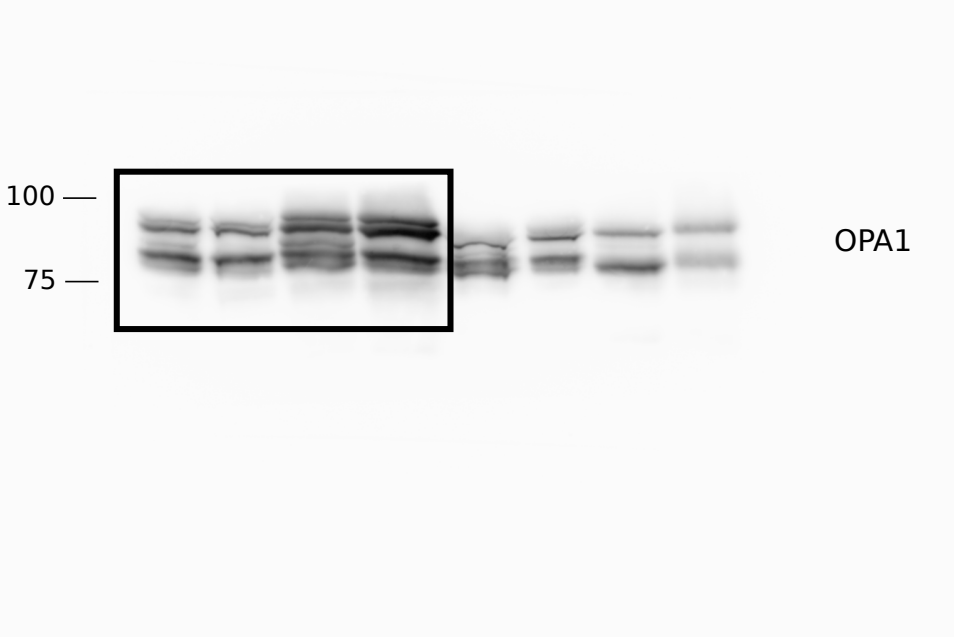

**B**

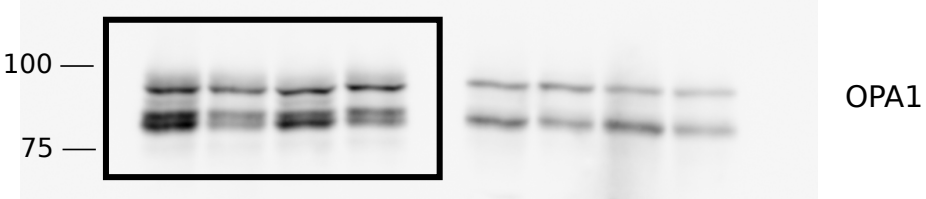

**C**

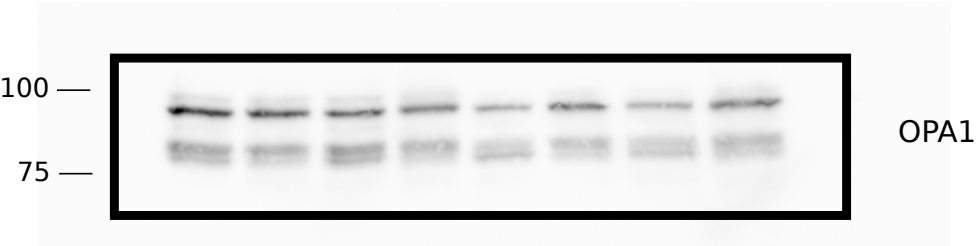

Supplement: emboj201270s6.pdf [file emboj201270s6.pdf]
